# Supplementary material
Source: PubMed Central journal article supplement (PMC5937682)
Supplement: NIHMS77400-supplement-Extended_data.pdf [file NIHMS77400-supplement-Extended_data.pdf]

|                                                  | INO80 nucleosome complex<br>(EMDB-3954)<br>(PDB 6ETX) |
|--------------------------------------------------|-------------------------------------------------------|
| <b>Data collection and processing</b>            |                                                       |
| Magnification                                    | 129,000                                               |
| Voltage (kV)                                     | 300                                                   |
| Electron exposure (e-/Å <sup>2</sup> )           | 80                                                    |
| Defocus range (µm)                               | -2.0 to -4.0                                          |
| Pixel size (Å)                                   | 1.13                                                  |
| Symmetry imposed                                 | C1                                                    |
| Initial particle images (no.)                    | 775,804                                               |
| Final particle images (no.)                      | 26,416                                                |
| Map resolution (Å)                               | 4.8                                                   |
| FSC threshold                                    | 0.143                                                 |
| Map resolution range (Å)                         | 4.0 to 8.0                                            |
| <b>Refinement</b>                                |                                                       |
| Initial model used (PDB code)                    | 2YQQ, 3LZ0, 5AV9, 5O9G,<br>5OAF                       |
| Model resolution (Å)                             | 4.8                                                   |
| Map sharpening <i>B</i> factor (Å <sup>2</sup> ) | -100                                                  |
| Refinement (Phenix)                              |                                                       |
| Map correlation coefficient (whole unit cell)    | 0.88                                                  |
| Map correlation coefficient (around atoms)       | 0.74                                                  |
| Model composition                                |                                                       |
| Non-hydrogen atoms                               | 38,759                                                |
| Protein residues                                 | 4,753                                                 |
| Nucleic acid residues                            | 300                                                   |
| Ligands                                          | 7                                                     |
| R.m.s. deviations                                |                                                       |
| Bond lengths (Å)                                 | 0.002                                                 |
| Bond angles (°)                                  | 0.447                                                 |
| Validation                                       |                                                       |
| MolProbity score                                 | 1.58 (93 <sup>rd</sup> percentile*(0Å - 99Å))         |
| Clashscore                                       | 8.4                                                   |
| Poor rotamers (%)                                | 1.5                                                   |
| Ramachandran plot                                |                                                       |
| Favored (%)                                      | 98.2                                                  |
| Allowed (%)                                      | 1.75                                                  |
| Disallowed (%)                                   | 0.02                                                  |

**a**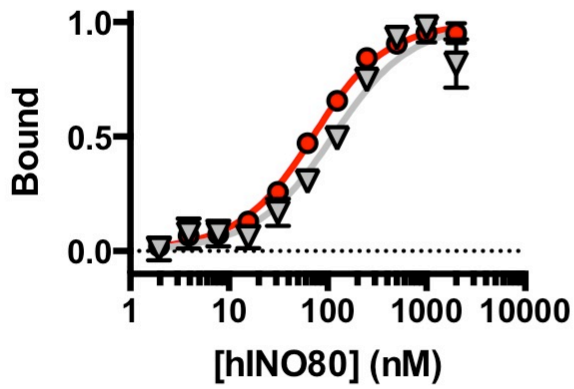

| Ligand                 | $k_{1/2}$ (nM)  | h             |
|------------------------|-----------------|---------------|
| ▽ Apo                  | $93.0 \pm 11.0$ | $1.6 \pm 0.1$ |
| ● ADP.BeF <sub>3</sub> | $51.0 \pm 2.9$  | $1.6 \pm 0.2$ |

**b**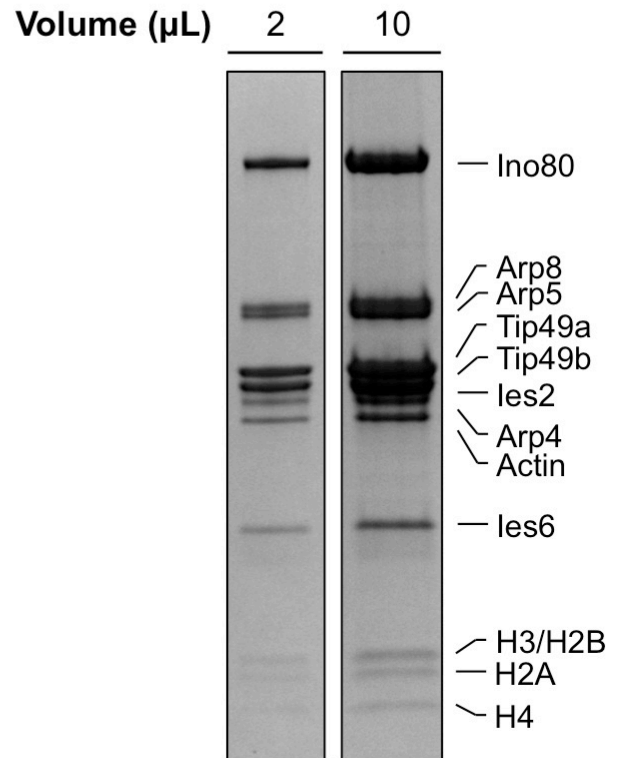**c**

1 GTCTTGAGTCCAACCGGTAAGACACGACTTATCGCCACCCCGAGTA 47  
 48 CATGCACAGGATGTATATATCTGACACGTGCCTGGAGACTAGGGAGT 94  
 95 AATCCCCTTGGCGGTTAAACGCGGGGGACAGCGCGTACGTGCGTTT 141  
 142 AAGCGGTGCTAGAGCTGTCTACGACCAATTGAGCGGCCTCGGCACCG 188  
 189 GGATTGTCCAGGGCGGCCGCGGATGCATTAATGCAGatt 227

**a**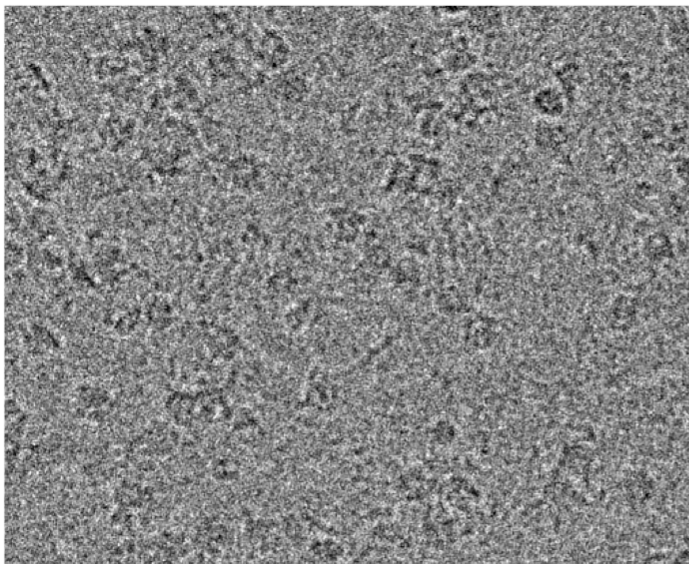**b**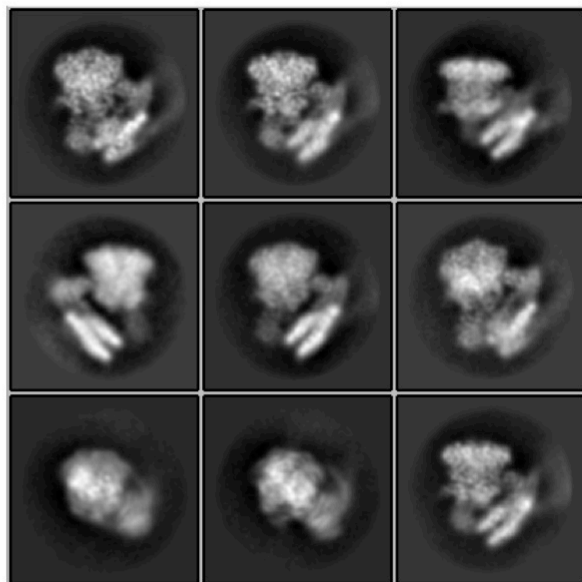**c**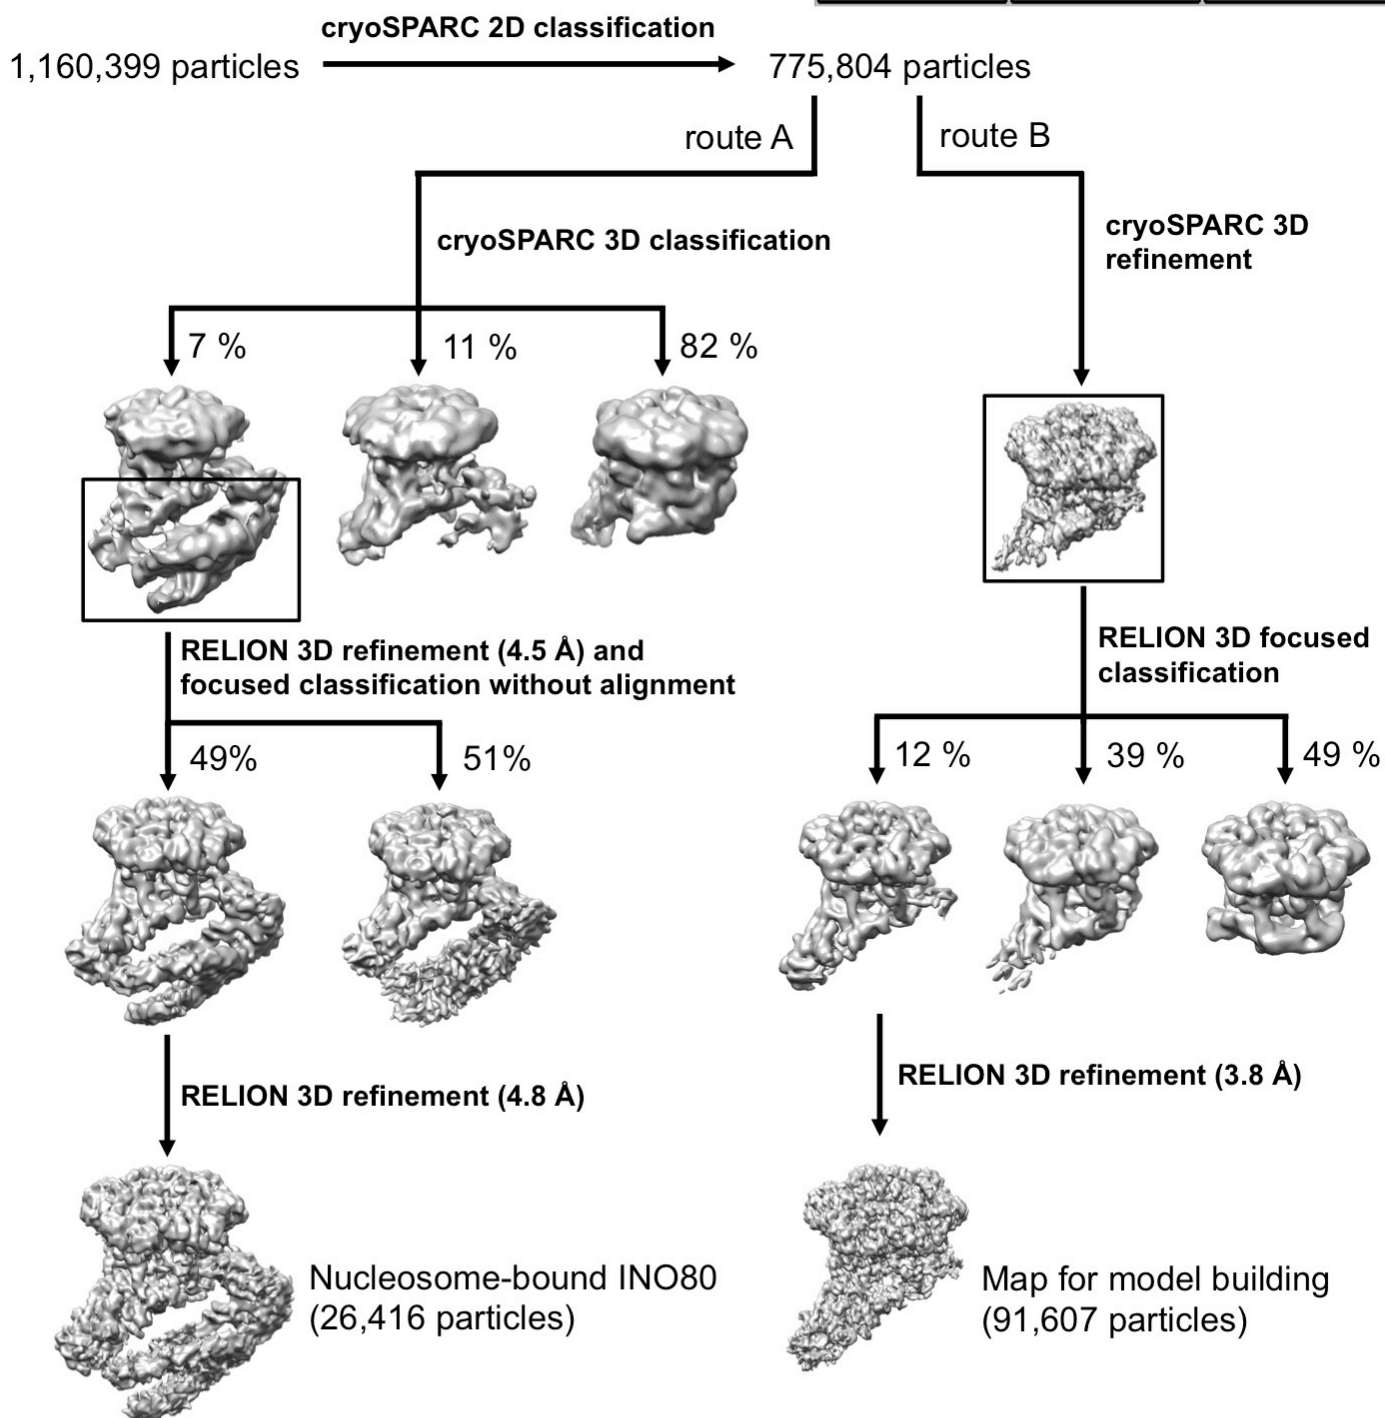

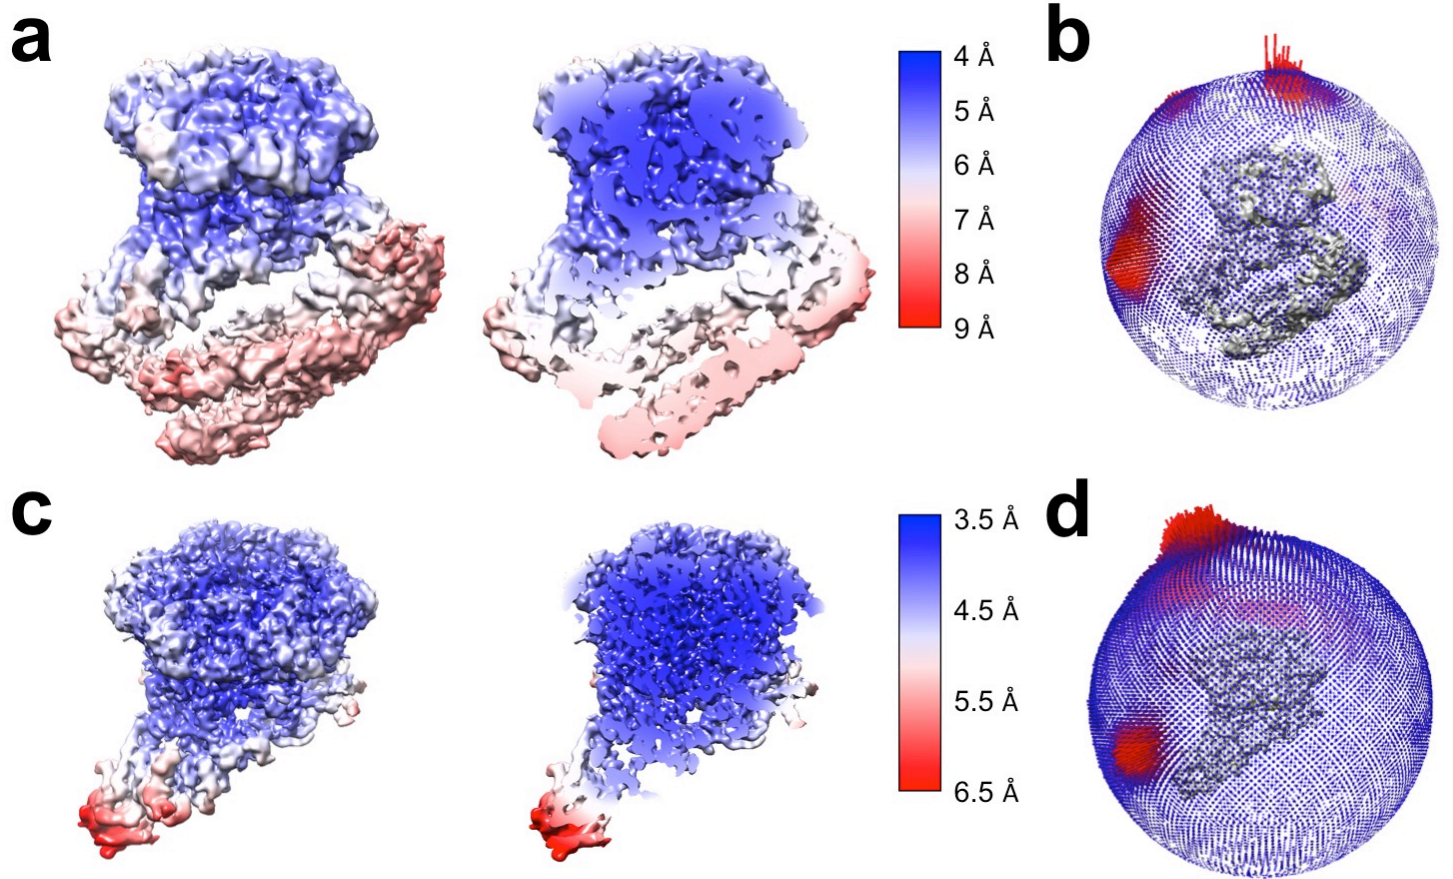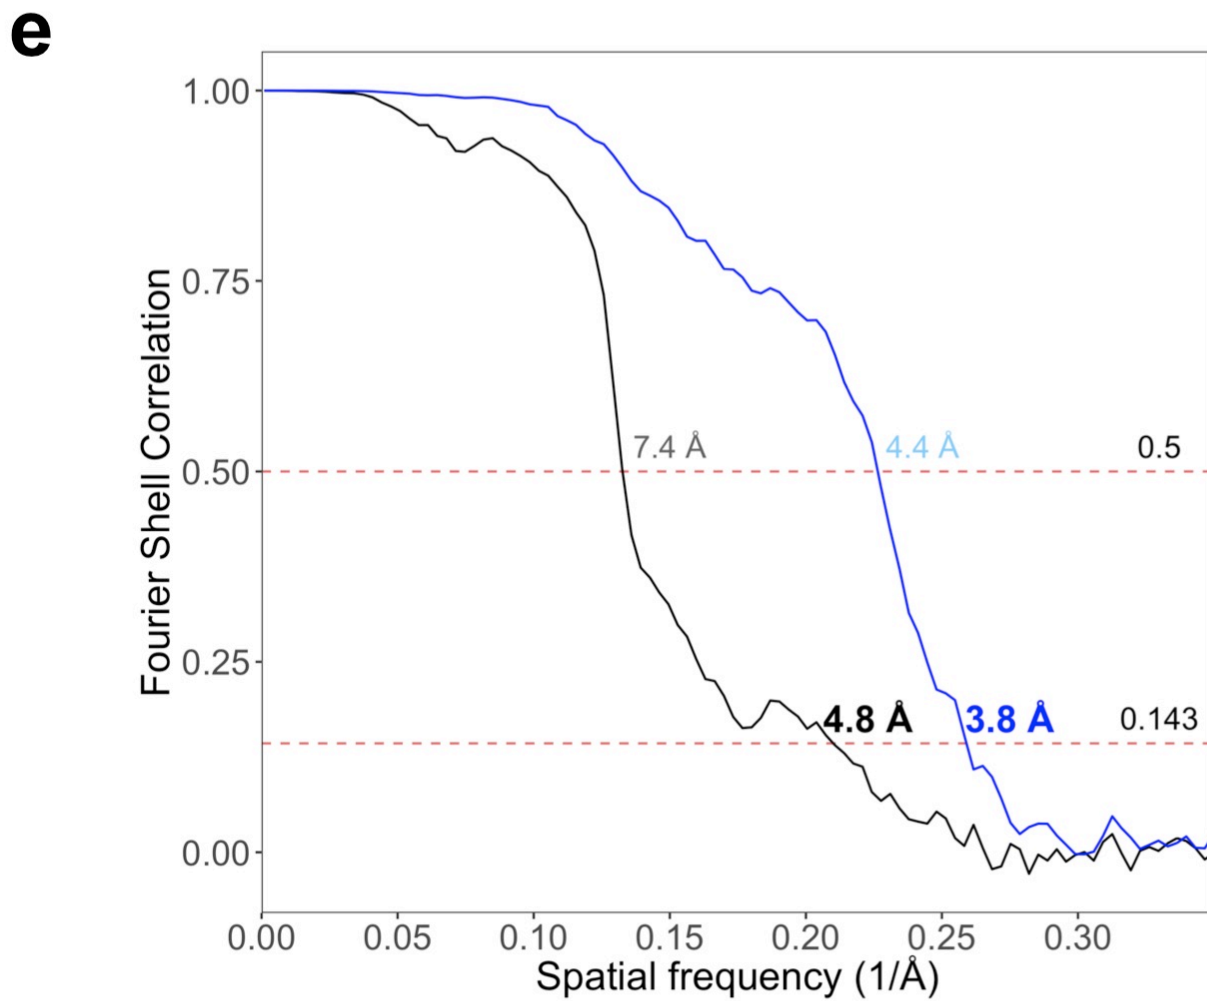



**INO80**

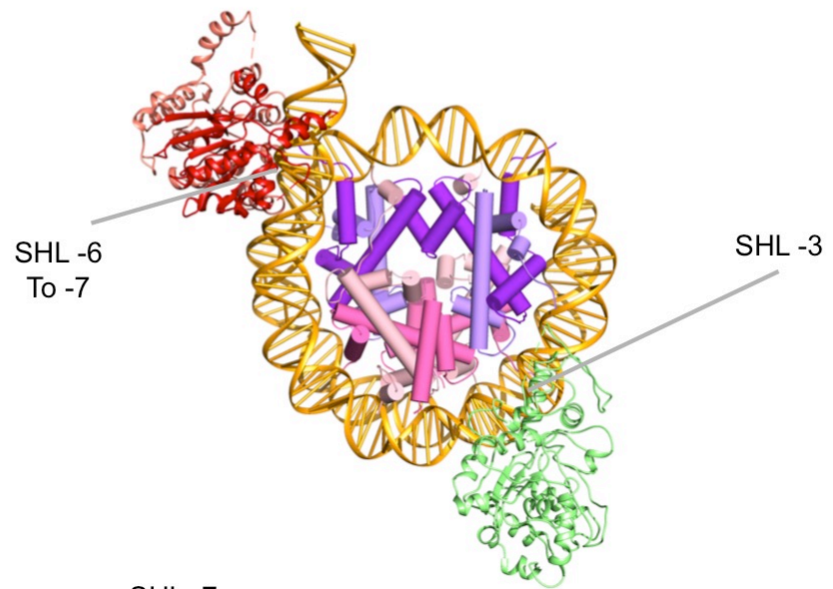

**CHD1**

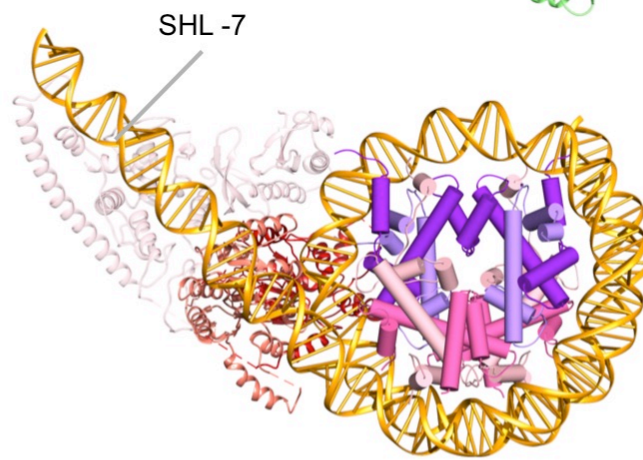

**SNF2 (SHL2)**

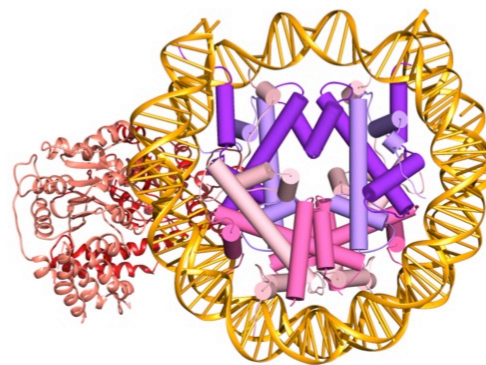

**a**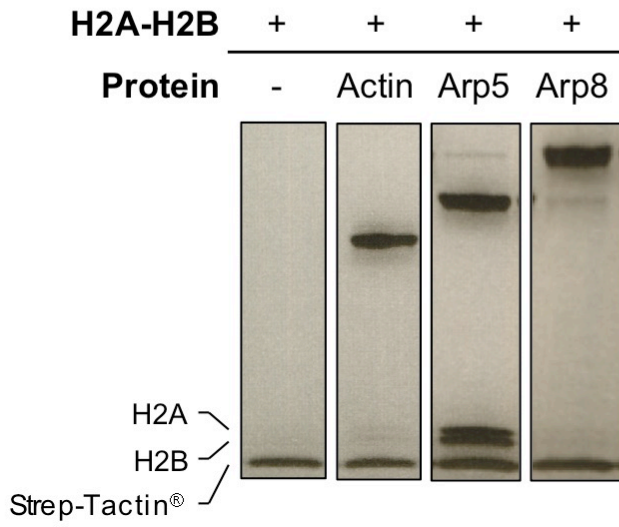**b**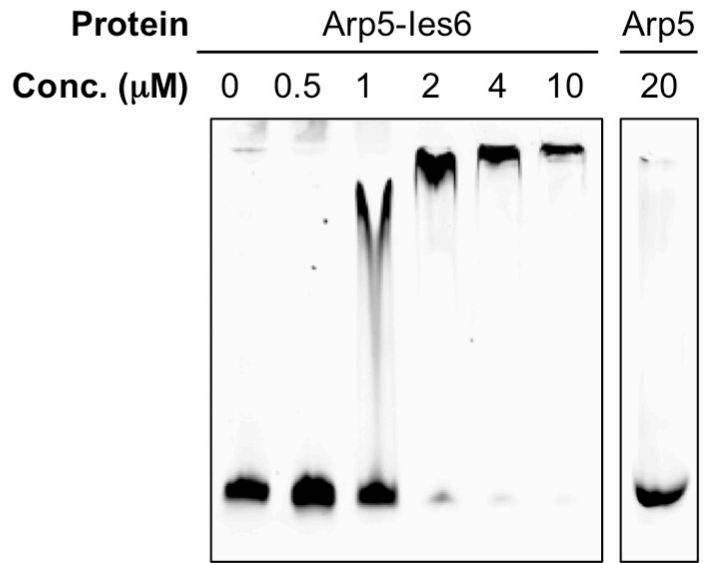**c**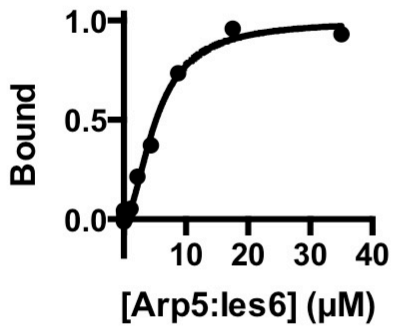

Substrate = ON100

 $k_{1/2} = 5.2 \pm 0.3 \mu\text{M}$  $r^2 = 0.99$ **d**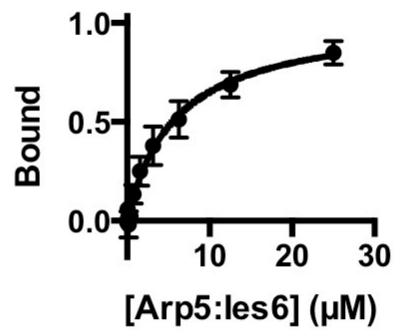

Substrate = H2A:H2B

 $k_{1/2} = 5.9 \pm 2.0 \mu\text{M}$  $r^2 = 0.97$

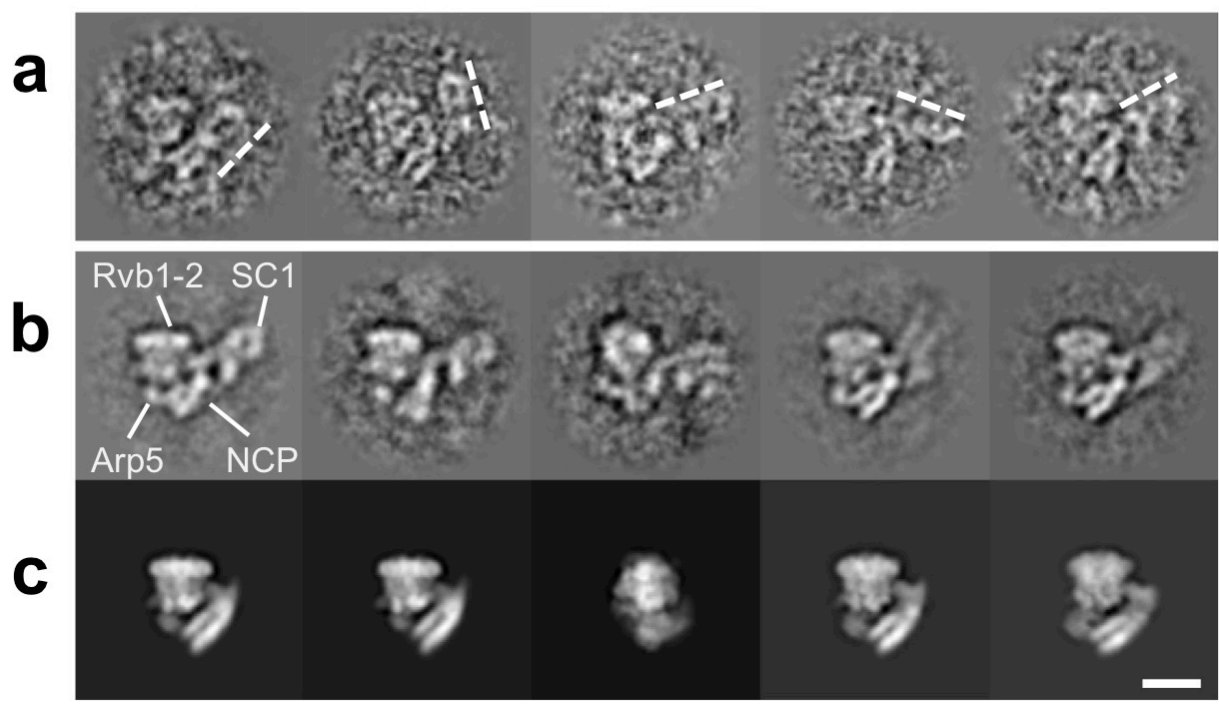



**a**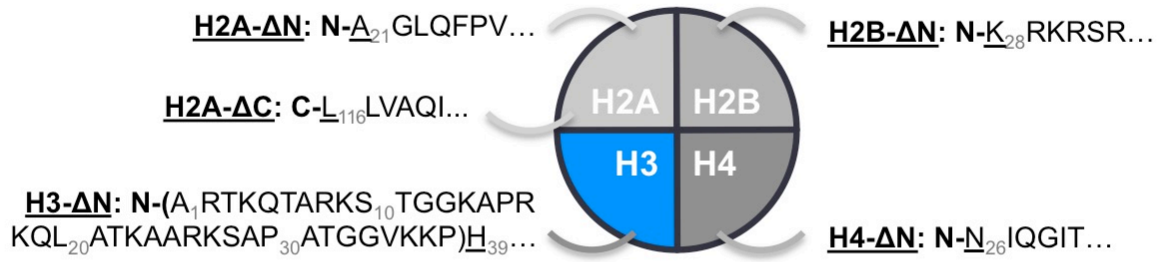**b**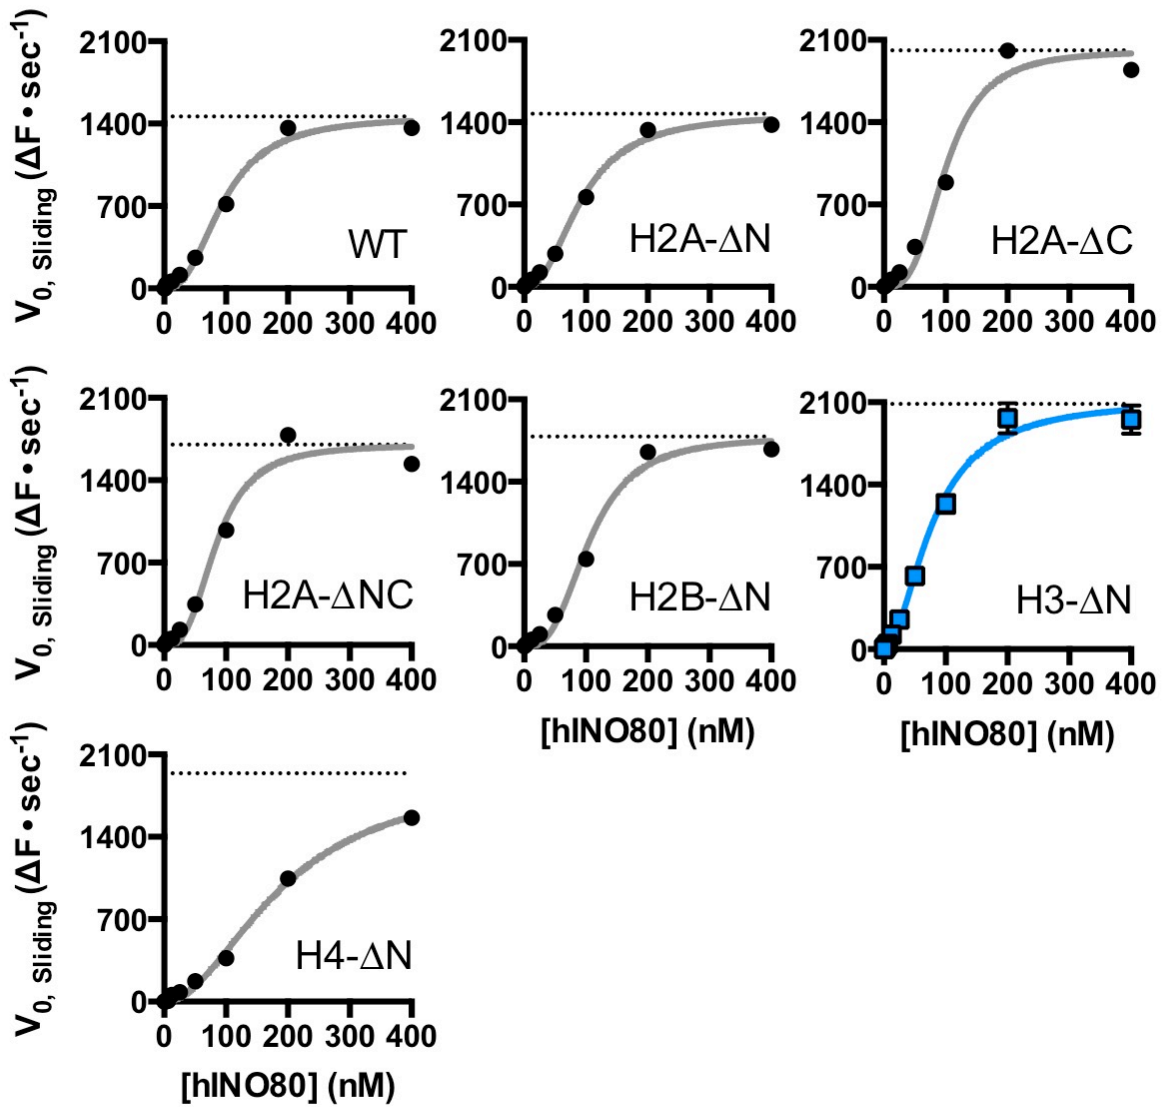

**a**

| Nucleosome                 | $V_{\max}$ (nM ATP $\cdot$ sec $^{-1}$ ) | $h_{\text{ATPase}}$             |
|----------------------------|------------------------------------------|---------------------------------|
| 0N100 (H3 <sup>FL</sup> )  | 2430.0 $\pm$ 69.0                        | <i>1.4 <math>\pm</math> 0.1</i> |
| 0N100 (H3 <sup>L20</sup> ) | 2050.0 $\pm$ 82.0                        | <i>1.3 <math>\pm</math> 0.1</i> |
| 0N100 (H3 <sup>P30</sup> ) | 2660.0 $\pm$ 92.0                        | <i>1.4 <math>\pm</math> 0.1</i> |
| 0N100 (H3 <sup>H39</sup> ) | 3150.0 $\pm$ 160.0                       | <i>1.3 <math>\pm</math> 0.1</i> |

\***Bold** =  $h > 1.5$ , *Italics* =  $h < 1.5$

**b**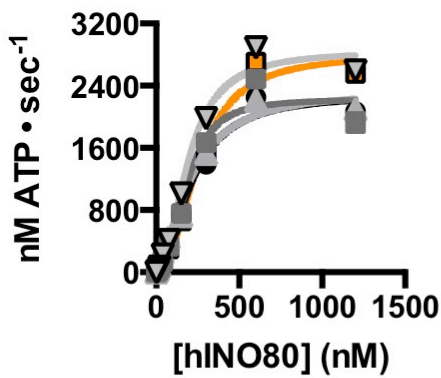

| Nucleosome                          | $V_{\max, \text{ATPase}}$ ( $\Delta F \cdot \text{sec}^{-1}$ ) | $h_{\text{ATPase}}$             |
|-------------------------------------|----------------------------------------------------------------|---------------------------------|
| $\nabla$ H3 <sup>WT</sup>           | 2850.0 $\pm$ 25.0                                              | <i>1.3 <math>\pm</math> 0.1</i> |
| $\blacksquare$ H3 <sup>K27Q</sup>   | 2231.0 $\pm$ 174.0                                             | <i>1.3 <math>\pm</math> 0.1</i> |
| $\blacktriangle$ H3 <sup>K36Q</sup> | 2348.0 $\pm$ 177.0                                             | <i>1.2 <math>\pm</math> 0.1</i> |
| $\bullet$ H3 <sup>K37Q</sup>        | 2289.0 $\pm$ 151.0                                             | <i>1.4 <math>\pm</math> 0.1</i> |
| $\square$ H3 <sup>K36Q, K37Q</sup>  | 2800.0 $\pm$ 174.0                                             | <i>1.3 <math>\pm</math> 0.1</i> |

\***Bold** =  $h > 1.5$ , *Italics* =  $h < 1.5$

**c**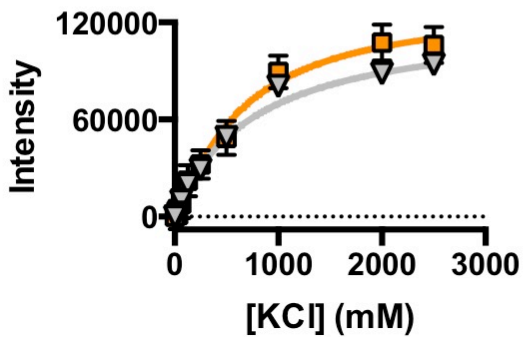

| Nucleosome                         | 50% Unwrapped (mM) |
|------------------------------------|--------------------|
| $\nabla$ H3 <sup>WT</sup>          | 753 $\pm$ 100      |
| $\square$ H3 <sup>K36Q, K37Q</sup> | 634 $\pm$ 199      |
