# Supplementary material
Source: PubMed Central journal article supplement (PMC5937682)
Supplement: NIHMS77400-supplement-Supplementary_Information.pdf [file NIHMS77400-supplement-Supplementary_Information.pdf]

# Supplementary Information 1

## Original Gel for Extended Data 1b

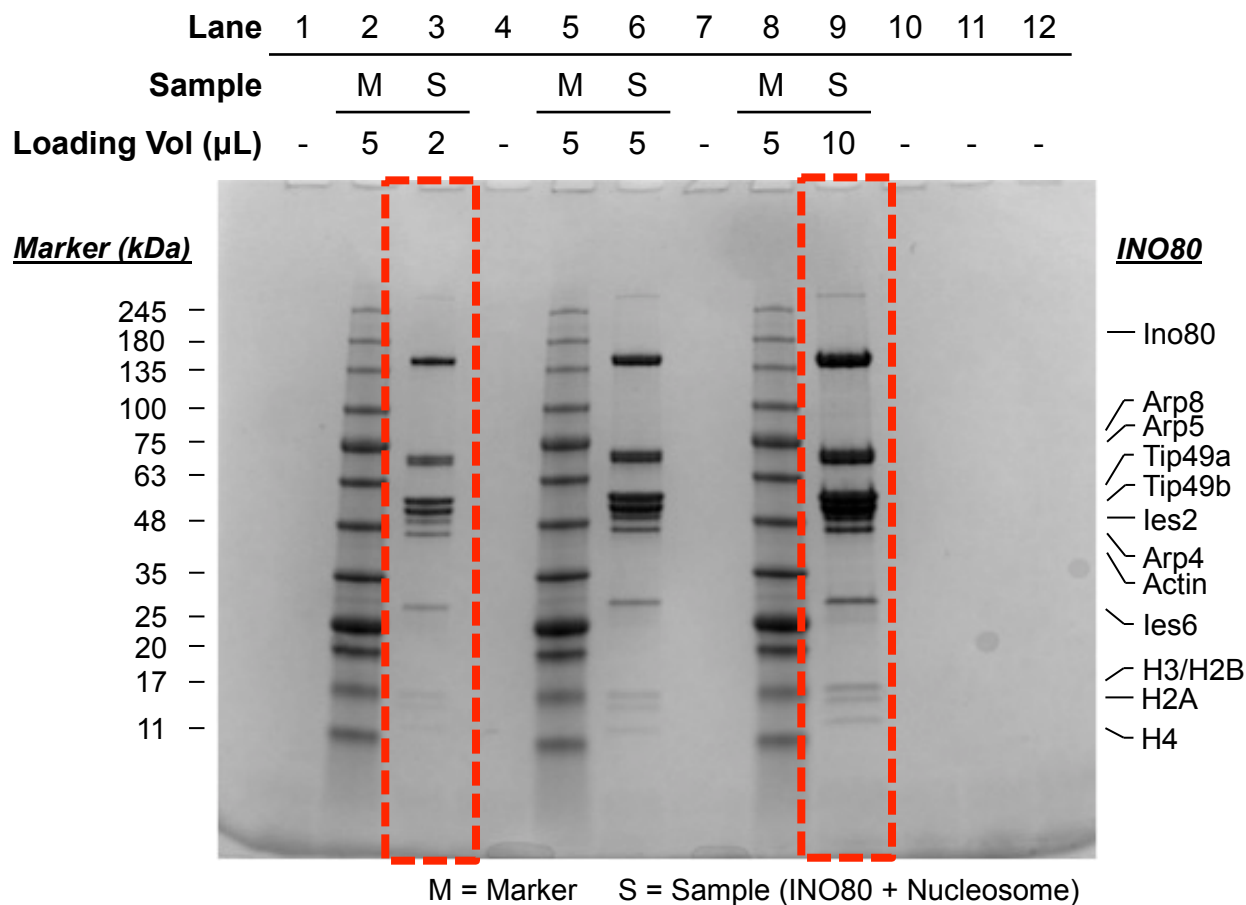

**Extended Data 1b. Analysis of INO80-nucleosome complex sample.** Varying quantities of INO80-nucleosome complex were analysed by SDS-PAGE on a 4-20% Tris-Glycine gel. Bands were visualised by Coomassie staining. Dashed boxes indicate the crop in the final version of this image, which includes only the 2 and 10  $\mu$ L loadings.

# Supplementary Information 1

## Original Gel for Extended Data 6a

| Lane         | 1 | 2 | 3 | 4     | 5 | 6    | 7 | 8    | 9 | 10   | 11 | 12 |
|--------------|---|---|---|-------|---|------|---|------|---|------|----|----|
| Bait Protein | M | - | - | Actin | - | Arp5 | - | Arp6 | - | Arp8 | -  | M  |
| H2A/H2A.Z    | - | A | Z | A     | Z | A    | Z | A    | Z | A    | Z  | -  |

### Marker (kDa)

245 —  
180 —  
135 —  
100 —  
75 —  
63 —  
48 —  
35 —  
25 —  
20 —  
17 —  
11 —

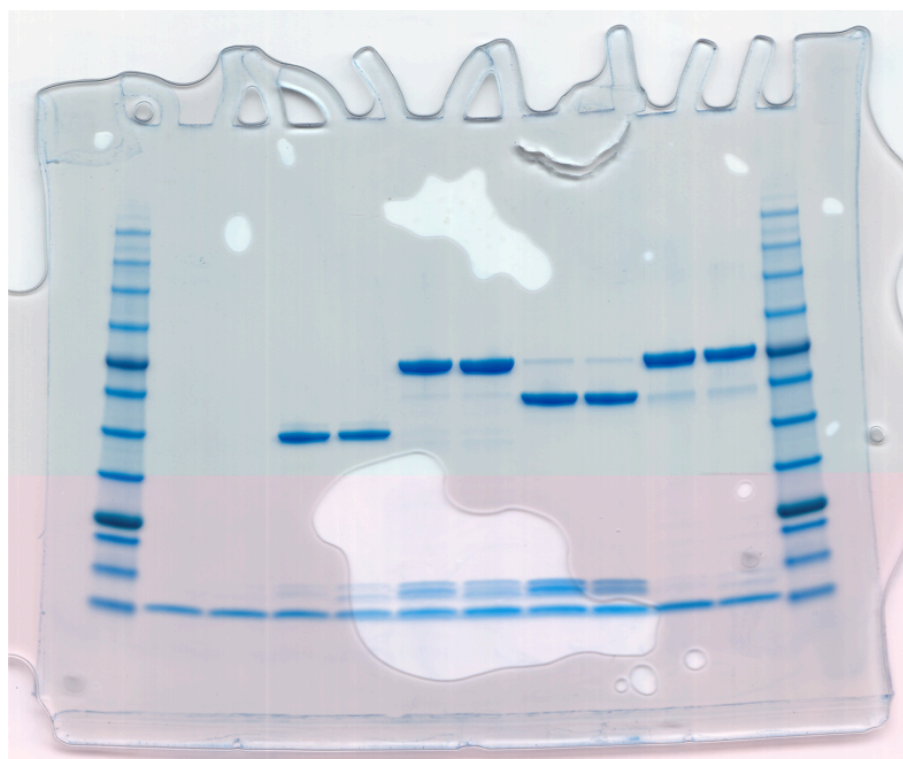

— Arp8  
— Arp5  
— Arp6  
— Actin  
  
— H2A/Z  
— H2B  
— Strep-Tactin®

M = Marker

**Extended Data 6. Interaction of human Actin, Arp5 and Arp8 with human H2A-H2B dimers assessed by *in vitro* pulldown.** a, SDS-PAGE analysis highlighting the interaction of Actin, Arp5 and Arp8 with H2A:H2B dimers. The original experiment also assessed the interaction with free H2A.Z:H2B histone dimers, and also included human Arp6 as an additional bait protein (a component of the human SRCAP complex). Denatured polypeptide bands were resolved on a 4-20% Tris-Glycine gel and visualised by Coomassie staining. The final crop shows only the H2A:H2B containing lanes for Actin, Arp5 and Arp8.

# Supplementary Information 1

## Original Gel for Extended Data 6b

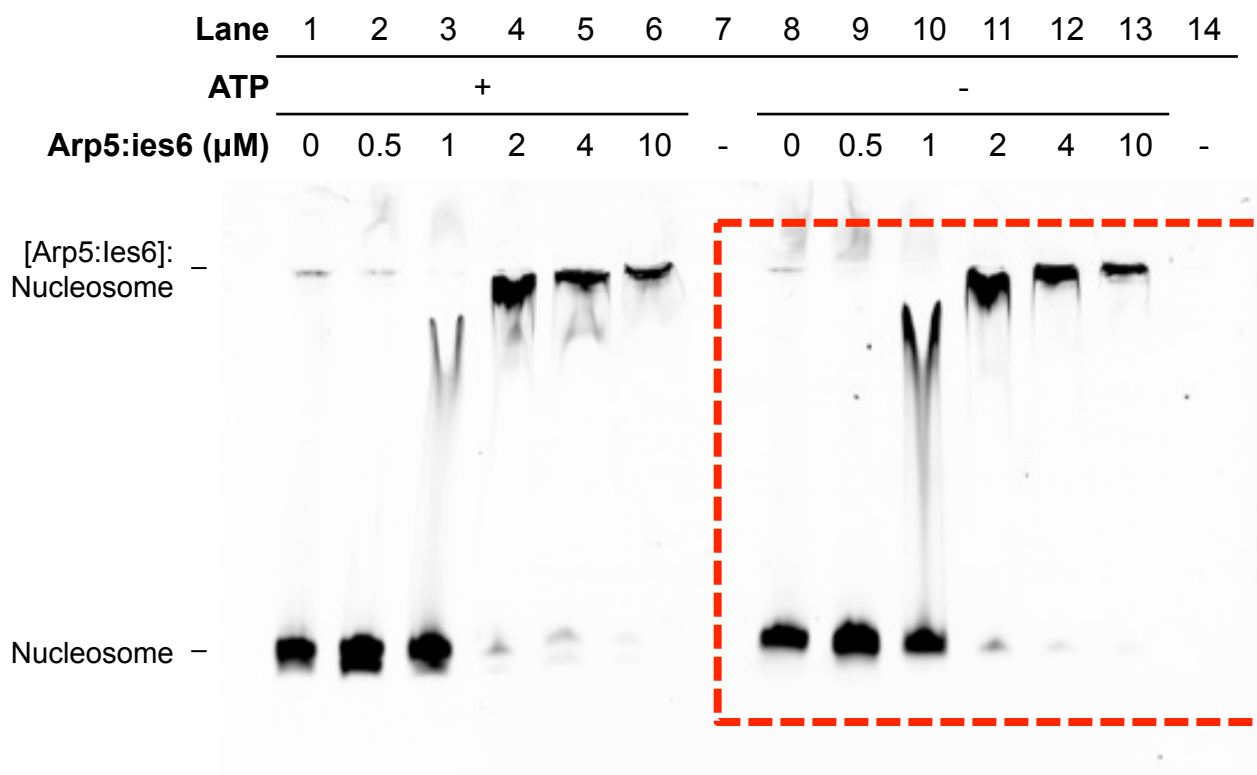

**Extended Data 6. Interaction of human Actin, Arp5 and Arp8 with human H2A-H2B dimers assessed by *in vitro* pulldown. b**, EMSA analysis of Arp5:ies6 interaction with nucleosomes. The nucleosomes in this experiment were fluorescently labelled with a Cy5 fluorophore. EMSA products were resolved by native PAGE on a 6% acrylamide, 0.5x TBE gel run in 0.5x TBE buffer, and then visualised by fluorescent scan on a flatbed scanner. The original experiment compared the effect of ATP on binding to the nucleosome substrate. The final crop contains only the right-hand side of this image, showing the electrophoretic mobility change in the absence of ATP (red dashed box).
